# Supplementary material for: Relationship between Chewing Ability and Nutritional Status in Japanese Older Adults: A Cross-Sectional Study
Source: PubMed Central journal article supplement (PMC7908427; doi:10.3390/ijerph18031216), 2021-01-29
Supplement: ijerph-18-01216-s001.pdf [file ijerph-18-01216-s001.pdf]

**Supplemental Data**

**Table S1.** Relationship between color-changeable xylitol gum color chart and albumin level (g/d L).

| Color Chart | n   | Albumin level |   |      | p for Trend |
|-------------|-----|---------------|---|------|-------------|
|             |     | average       | ± | SD   |             |
| 1           | 25  | 4.26          | ± | 0.25 | 0.017       |
| 2           | 110 | 4.26          | ± | 0.27 |             |
| 3           | 166 | 4.29          | ± | 0.22 |             |
| 4           | 153 | 4.35          | ± | 0.23 |             |
| 5           | 55  | 4.35          | ± | 0.25 |             |

We used a trend-test. Values are expressed as mean ± standard deviation

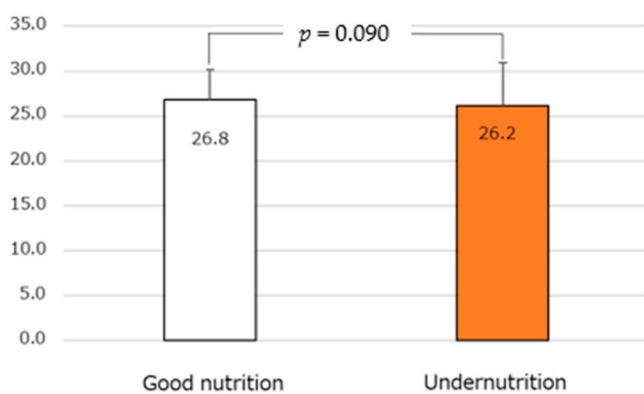

**Figure S2.** Relationship between nutritional status and functional teeth. We used a t-test. Values are expressed as mean ± standard deviation.
